# Supplementary material
Source: PubMed Central journal article supplement (PMC6437492)
Supplement: AAC.02152-18-s0001.pdf [file AAC.02152-18-s0001.pdf]

# Iron Chelator Deferasirox Reduces *Candida albicans* Invasion of Oral Epithelial Cells and Infection Levels in Murine Oropharyngeal Candidiasis

## Supplementary Information

**Table S1: All *C. albicans* genes that were differentially expressed in response to preventive Deferasirox treatment *in vivo***

| Gene ID                                     | Gene Name               | Function                                                                                                                                                                                                                                                      | log <sub>2</sub> (fold-change) | P-value  |
|---------------------------------------------|-------------------------|---------------------------------------------------------------------------------------------------------------------------------------------------------------------------------------------------------------------------------------------------------------|--------------------------------|----------|
| <b>Upregulated <i>C. albicans</i> genes</b> |                         |                                                                                                                                                                                                                                                               |                                |          |
| <b>C1_04650W_B</b>                          | <i>DUR3</i>             | High affinity spermidine transporter; expression is induced by urea; fungal-specific (no human or murine homolog); not required for virulence in a mouse intravenous model                                                                                    | 5.8994                         | 5.00E-05 |
| <b>C4_00430W_B</b>                          | <i>MEP2</i>             | Ammonium permease and regulator of nitrogen starvation-induced filamentation; 11 predicted transmembrane regions; in low nitrogen cytoplasmic C-terminus activates Ras/cAMP and MAPK signal transduction pathways to induce filamentation                     | 4.19734                        | 5.00E-05 |
| <b>C1_04660W_B</b>                          | <i>DUR1,2</i>           | Urea amidolyase; hydrolyzes urea to CO <sub>2</sub> ; use of urea as N source and for hyphal switch in macrophage; regulated by Nrg1/Hap43; required for virulence; promotes mouse kidney and brain colonization; rat catheter and flow model biofilm induced | 4.08792                        | 5.00E-05 |
| <b>C2_01000W_B</b>                          | <i>HGT7</i>             | Putative MFS glucose transporter; glucose, fluconazole, Snf3 induced, expressed at high glucose; 20 member <i>C. albicans</i> glucose transporter family; 12 TM regions predicted; flow model biofilm induced; Spider biofilm repressed                       | 3.46671                        | 5.00E-05 |
| <b>CR_01910C_B</b>                          | <i>BIO4</i><br>(alias)  | Putative dethiobiotin synthetase; transcript upregulated in clinical isolates from HIV+ patients with oral candidiasis; Hap43-repressed; GlcNAc-induced protein; Spider biofilm induced                                                                       | 3.17951                        | 0.00905  |
| <b>CR_04210C_A</b>                          | <i>QDR1</i>             | Putative antibiotic resistance transporter; regulated by white-opaque switch, Nrg1, Tup1; Hap43, caspofungin repressed; repressed during chlamydospore formation; flow model biofilm induced; Spider biofilm repressed                                        | 3.1071                         | 0.00015  |
| <b>CR_03270W_A</b>                          | <i>VHT1</i>             | Predicted membrane transporter, member of the anion:cation symporter (ACS) family, major facilitator superfamily (MFS); amphotericin B, caspofungin repressed; Hap43p-repressed                                                                               | 3.00409                        | 0.00105  |
| <b>CR_01920W_B</b>                          | <i>BIO31</i><br>(alias) | Ortholog(s) have adenosylmethionine-8-amino-7-oxononanoate transaminase activity and role in biotin biosynthetic process                                                                                                                                      | 2.78716                        | 0.0144   |
| <b>C1_02980W_A</b>                          | <i>GOR1</i>             | Ortholog(s) have glyoxylate reductase activity, role in glyoxylate catabolic process and cytosol, extracellular region, mitochondrion, nucleus localizatio                                                                                                    | 2.77539                        | 0.00355  |

|                    |                        |                                                                                                                                                                                                                                                            |         |          |
|--------------------|------------------------|------------------------------------------------------------------------------------------------------------------------------------------------------------------------------------------------------------------------------------------------------------|---------|----------|
| <b>C3_02310W_A</b> | <i>MEP1</i>            | Ammonium permease; Mep1 more efficient permease than Mep2, Mep2 has additional regulatory role; 11 predicted transmembrane regions; low mRNA abundance; hyphal downregulated; flow model biofilm induced (                                                 | 2.66297 | 5.00E-05 |
| <b>C4_06530C_A</b> | <i>XUT1</i>            | Putative high-affinity, high-capacity xanthine-uric acid/H <sup>+</sup> symporter; similar to <i>A. nidulans</i> UapA; member of the Nucleobase-Ascorbate Transporter/Nucleobase-Cation Symporter (NAT/NCS2) family; rat catheter biofilm induced          | 2.42765 | 0.0014   |
| <b>C1_08790W_B</b> | <i>TPO3</i>            | Putative polyamine transporter; MFS-MDR family; induced by Sfu1, regulated upon white-opaque; decreased expression in hyphae vs yeast-form cells; regulated by Nrg1; Spider biofilm repressed                                                              | 2.33814 | 0.0124   |
| <b>C2_03120W_A</b> | <i>AMO1</i>            | Putative peroxisomal copper amine oxidase                                                                                                                                                                                                                  | 2.15342 | 0.0009   |
| <b>CR_02060W_A</b> | <i>PMU4</i>            | Protein of unknown function; Spider biofilm induced                                                                                                                                                                                                        | 2.12432 | 0.0049   |
| <b>C4_00450C_B</b> | <i>PGA10</i>           | Iron acq; GPI anchored membrane protein; utilization of hemin and hemoglobin for Fe in host; Rim101 at pH8/hypoxia/ketoconazole/ciclopirox/hypha-induced; required for RPMI biofilm formation, Bcr1-induced in a/a biofilm; rat catheter biofilm repressed | 2.10848 | 0.00345  |
| <b>C2_08590W_A</b> | <i>YWP1</i>            | Secreted yeast wall protein; possible role in dispersal in host; mutation increases adhesion and biofilm formation; propeptide; growth phase, phosphate, Ssk1/Ssn6/Efg1/Efh1/Hap43 regulated; mRNA binds She3; flow and Spider biofilm repressed           | 2.10571 | 0.0054   |
| <b>C6_01510W_B</b> | <i>OYE23</i>           | Putative NADPH dehydrogenase; induced by nitric oxide, benomyl; oxidative stress-induced via Cap1; Hap43p-repressed; rat catheter biofilm induced                                                                                                          | 2.03668 | 0.0264   |
| <b>C2_05890C_A</b> | <i>IDP1</i>            | Putative isocitrate dehydrogenase; transcriptionally induced by interaction with macrophage; alkaline induced; Spider biofilm repressed                                                                                                                    | 2.02428 | 0.00295  |
| <b>C1_05830W_A</b> | <i>TMT1</i><br>(alias) | Ortholog(s) have trans-aconitate 3-methyltransferase activity and cytosol, nucleus localization                                                                                                                                                            | 1.97946 | 0.0404   |
| <b>C2_02580W_B</b> | N/A                    | Predicted MFS membrane transporter; monocarboxylate porter family member; colony morphology-related gene regulation by Ssn6; flow model biofilm induced; Spider biofilm induced                                                                            | 1.95251 | 0.018    |
| <b>C4_03950C_A</b> | N/A                    | Protein of unknown function                                                                                                                                                                                                                                | 1.94228 | 0.03235  |
| <b>C4_03960W_A</b> | N/A                    | Protein of unknown function; ORF added to Assembly 21 based on comparative genome analysis; protein detected by mass spec in stationary phase cultures                                                                                                     | 1.90096 | 0.00385  |
| <b>C1_01440C_B</b> | <i>POX18</i>           | Similar to Pox18, a peroxisomal protein; induced during chlamyospore formation in <i>C. albicans</i> and <i>C. dubliniensis</i> ; A21 sequence updated based on new sequence and analysis, the allelic orf19.10841 was reinstated; Spider biofilm induced  | 1.78032 | 0.0082   |
| <b>C2_04460W_A</b> | <i>LYS22</i>           | Homocitrate synthase, minor isoform; repressed by nitric oxide and by hypoxia; protein level decreases in stationary phase cultures; induced by ketoconazole, Spider biofilm induced; flow model biofilm repressed                                         | 1.76911 | 0.0071   |
| <b>C4_03500C_A</b> | N/A                    | Protein of unknown function; regulated by Tsa1, Tsa1B in minimal media at 37 degrees C                                                                                                                                                                     | 1.74569 | 0.0245   |
| <b>C6_00870C_A</b> | <i>ILV5</i>            | Ketol-acid reductoisomerase; antigenic; regulated by Gcn4; GlcNAc, amino acid starvation (3-AT)-induced; macrophage-repressed protein; protein present in exponential and stationary phase; flow model and Spider biofilm repressed                        | 1.73544 | 0.01485  |
| <b>C6_01680C_B</b> | N/A                    | Ortholog(s) have endoplasmic reticulum, fungal-type vacuole localization                                                                                                                                                                                   | 1.71718 | 0.0338   |
| <b>C4_00650W_B</b> | <i>HIS5</i>            | Putative histidinol-phosphate aminotransferase; Gcn4p-regulated; protein present in exponential and stationary growth phase yeast cultures                                                                                                                 | 1.69341 | 0.0469   |
| <b>C6_04380W_A</b> | <i>ALS2</i>            | Ind by low Fe, ALS family protein; role in adhesion, biofilm formation, germ tube induction; expressed at infection of human buccal epithelial                                                                                                             | 1.64312 | 0.00265  |

|                    |                         |                                                                                                                                                                                                                                                 |         |         |
|--------------------|-------------------------|-------------------------------------------------------------------------------------------------------------------------------------------------------------------------------------------------------------------------------------------------|---------|---------|
|                    |                         | cells; putative GPI-anchor; induced by ketoconazole, low iron and at cell wall regeneration; regulated by Sfu1p                                                                                                                                 |         |         |
| <b>C2_04230W_B</b> | <i>BAT21</i>            | Putative branched chain amino acid aminotransferase; regulated by Gcn4, Gcn2; induced in response to amino acid starvation (3-aminotriazole treatment); early-stage flow model biofilm formation                                                | 1.62417 | 0.00675 |
| <b>C3_04340W_A</b> | <i>ATF1</i>             | Putative alcohol acetyltransferase; caspofungin repressed; expression depends on Tac1p                                                                                                                                                          | 1.59308 | 0.0097  |
| <b>C4_06120W_A</b> | <i>GDH3</i>             | NADP-glutamate dehydrogenase; Nrg1, Plc1 regulated; hypha, hypoxia, Efg1-repressed; Rim101-induced at pH 8; GlcNAc, ciclopirox, ketoconazole induced; exp and stationary phase protein; Spider biofilm repressed; rat catheter biofilm induced  | 1.52725 | 0.03635 |
| <b>C2_00180C_B</b> | <i>URO99</i><br>(alias) | Predicted uricase; ortholog of <i>S. pombe</i> SPCC1223.09; Spider biofilm induced                                                                                                                                                              | 1.52279 | 0.0178  |
| <b>CR_01330W_B</b> | <i>CPA2</i>             | Putative arginine-specific carbamoylphosphate synthetase; protein enriched in stationary phase yeast cultures; rat catheter biofilm induced; Spider biofilm induced                                                                             | 1.50089 | 0.02485 |
| <b>C7_02150C_A</b> | <i>ECM42</i>            | Ornithine acetyltransferase; Gcn2, Gcn4-regulated; clade-specific gene expression; possibly essential gene, disruptants not obtained by UAU1 method; Spider biofilm induced                                                                     | 1.48418 | 0.01195 |
| <b>C2_08260W_B</b> | N/A                     | Protein of unknown function; Hap43-repressed gene; by Rgt1; repressed in Spider biofilms by Bcr1, Tec1, Brg1, Rob1 and induced by Efg1, Ndt80; Spider biofilm induced                                                                           | 1.48262 | 0.0305  |
| <b>C7_03300C_B</b> | <i>LIP8</i>             | Secreted lipase, member of a differentially expressed lipase gene family with possible roles in nutrition and/or in creating an acidic microenvironment; LIP5 and LIP8 are expressed at all stages of both mucosal and systemic infection       | 1.47284 | 0.02795 |
| <b>C2_03640W_B</b> | <i>UGA11</i>            | Putative gamma-aminobutyrate (GABA) transaminase; macrophage-induced; overlaps orf19.854.1, which is a region annotated as a blocked reading frame; Spider biofilm induced                                                                      | 1.41086 | 0.0361  |
| <b>C1_02620C_B</b> | <i>HOM6</i>             | Putative homoserine dehydrogenase; Gcn4-regulated; induced by amino acid starvation (3-AT treatment); macrophage-induced protein; protein level decreases in stationary phase cultures; flow model biofilm repressed                            | 1.40735 | 0.02785 |
| <b>C1_11790W_A</b> | <i>CDC8</i>             | Ortholog(s) have thymidylate kinase activity, uridylate kinase activity, role in dTDP biosynthetic process, dTTP biosynthetic process, dUDP biosynthetic process and cytosol, nucleus localization                                              | 1.37698 | 0.0315  |
| <b>C6_04130C_B</b> | <i>ALS4</i>             | GPI-anchored adhesin; role in adhesion, germ tube induction; growth, temperature regulated; expressed during infection of human buccal epithelial cells; repressed by vaginal contact; biofilm induced; repressed during chlamyospore formation | 1.37573 | 0.0279  |
| <b>CR_01400W_B</b> | <i>LYS12</i>            | Homoisocitrate dehydrogenase; catalyzes 4th step in the alpha-amino adipate pathway of lysine biosynthesis; clade-associated gene expression; protein level decreases in stationary phase cultures; Spider biofilm repressed                    | 1.37415 | 0.02925 |
| <b>C2_06630C_B</b> | N/A                     | Ortholog of <i>C. parapsilosis</i> CDC317 : CPAR2_104640 and <i>Candida orthopsilosis</i> Co 90-125 : CORT_0B05695                                                                                                                              | 1.33433 | 0.03015 |
| <b>C1_02620C_A</b> | <i>HOM6</i>             | Putative homoserine dehydrogenase; Gcn4-regulated; induced by amino acid starvation (3-AT treatment); macrophage-induced protein; protein level decreases in stationary phase cultures; flow model biofilm repressed                            | 1.26774 | 0.04095 |
| <b>C1_05080W_A</b> | <i>GPT1</i>             | GABA/polyamine transporter; 9 to 11 membrane spanning segments; complements GABA uptake defect of an <i>S. cerevisiae</i> uga4 put4 gap1 triple mutant; complements growth of an <i>S. cerevisiae</i> spe1 mutant under polyamine limitation    | 1.25542 | 0.0456  |
| <b>C3_03360W_B</b> | <i>FCY2</i>             | Purine-cytosine permease of pyrimidine salvage; mutation associated with resistance to flucytosine in clinical isolates; transposon mutation affects filamentation; farnesol-upregulated in biofilm                                             | 1.2481  | 0.01945 |

|                                               |              |                                                                                                                                                                                                                                                 |          |         |
|-----------------------------------------------|--------------|-------------------------------------------------------------------------------------------------------------------------------------------------------------------------------------------------------------------------------------------------|----------|---------|
| <b>C2_03320W_A</b>                            | <i>CHK1</i>  | Histidine kinase; 2-component signaling, cell wall synthesis; hyphal growth defect; avirulent in mouse, not rat vaginal infection; phagocytosis rate increased; Spider biofilm induced; required for RPMI biofilm; Bcr1-induced in a/a biofilm  | 1.23818  | 0.04595 |
| <b>C2_02380W_B</b>                            | <i>POB3</i>  | Protein involved in chromatin assembly and disassembly; ortholog of <i>S. cerevisiae</i> Pob3; transposon mutation affects filamentous growth; rat catheter biofilm repressed                                                                   | 1.22621  | 0.0441  |
| <b>C4_05540W_B</b>                            | <i>HOM3</i>  | Putative L-aspartate 4-P-transferase; fungal-specific (no human or murine homolog); regulated by Gcn2 and Gcn4; early-stage flow model biofilm induced                                                                                          | 1.18615  | 0.04355 |
| <b>C2_04880C_A</b>                            | <i>ARH2</i>  | Putative adrenodoxin-NADPH oxidoreductase; role in heme biosynthesis                                                                                                                                                                            | 1.1585   | 0.04425 |
| <b>C5_02270W_B</b>                            | <i>THR4</i>  | Putative threonine synthase; protein present in exponential and stationary growth phase yeast cultures; Gcn4p-regulated; sumoylation target                                                                                                     | 1.14542  | 0.0392  |
| <b>C1_00680W_B</b>                            | <i>ASM3</i>  | Putative secreted acid sphingomyelin phosphodiesterase; possible Kex2 substrate; transcript increased in an azole-resistant strain that overexpresses MDR1; flow model biofilm induced; F-12/CO2 early biofilm induced                          | 1.11878  | 0.0343  |
| <b>C1_10290W_A</b>                            | <i>GCA1</i>  | Extracellular/plasma membrane-associated glucoamylase; expressed in rat oral infection; regulated by carbohydrates, pH, galactose; promotes biofilm matrix formation; flow model biofilm induced; Bcr1 repressed in RPMI a/a biofilms           | 1.07115  | 0.048   |
| <b>C4_05070C_B</b>                            | <i>ARG8</i>  | Putative acetylornithine aminotransferase; Gcn2, Gcn4 regulated; rat catheter biofilm induced; Spider biofilm induced                                                                                                                           | 1.01186  | 0.04885 |
| <b>Downregulated <i>C. albicans</i> genes</b> |              |                                                                                                                                                                                                                                                 |          |         |
| <b>C4_04080C_B</b>                            | <i>PGA31</i> | Cell wall protein; putative GPI anchor; expression regulated upon white-opaque switch; induced by Congo Red and cell wall regeneration; Bcr1-repressed in RPMI a/a biofilms                                                                     | -4.18385 | 0.00425 |
| <b>CM_00360W</b>                              | <i>RRNS</i>  | Mitochondrial ribosomal RNA of the small ribosomal subunit                                                                                                                                                                                      | -2.86056 | 0.0049  |
| <b>CM_00010W</b>                              | <i>RRNL</i>  | Mitochondrial ribosomal RNA of the large ribosomal subunit                                                                                                                                                                                      | -2.84331 | 0.00305 |
| <b>C6_03790C_B</b>                            | <i>HGT10</i> | Glycerol permease involved in glycerol uptake; member of the major facilitator superfamily; induced by osmotic stress, at low glucose in rich media, during cell wall regeneration; 12 membrane spans; Hap43p-induced gene                      | -2.50627 | 0.0251  |
| <b>C6_02100W_A</b>                            | <i>LDG8</i>  | Secreted protein; Hap43-repressed; fluconazole-induced; regulated by Tsa1, Tsa1B under H2O2 stress conditions; induced by Mnl1p under weak acid stress; Spider biofilm induced                                                                  | -2.35105 | 0.00025 |
| <b>C4_04030W_B</b>                            | <i>JEN2</i>  | Dicarboxylic acid transporter; regulated by glucose repression; induced by Rgt1; disruptants not obtained by UAU1 method; rat catheter and Spider biofilm induced                                                                               | -2.31791 | 0.0006  |
| <b>C1_07580C_A</b>                            | <i>PRY1</i>  | Pry family pathogenesis-related protein; extracellular; opaque specific transcript; repressed by alpha pheromone in SpiderM medium; possibly essential, disruptants not obtained by UAU1 method; Spider biofilm induced                         | -2.30998 | 0.00245 |
| <b>CR_06460W_B</b>                            | <i>GST3</i>  | Glutathione S-transferase; expression regulated upon white-opaque switch; induced by human neutrophils; peroxide-induced; induced by alpha pheromone in SpiderM medium; Spider biofilm induced                                                  | -2.29826 | 0.0287  |
| <b>CM_00210W</b>                              | <i>COX1</i>  | Subunit I of cytochrome c oxidase, which is the terminal member of the mitochondrial (mt) inner membrane electron transport chain; one of three mt-encoded subunits; alternatively spliced transcripts encode 4 putative splicing endonucleases | -2.24439 | 0.0051  |
| <b>CM_00140C</b>                              | <i>ATP9</i>  | Subunit 9 of the F0 sector of mitochondrial F1F0 ATP synthase, which is a large, evolutionarily conserved enzyme complex required for ATP synthesis                                                                                             | -2.09495 | 0.02455 |

|                    |                         |                                                                                                                                                                                                                                                              |          |         |
|--------------------|-------------------------|--------------------------------------------------------------------------------------------------------------------------------------------------------------------------------------------------------------------------------------------------------------|----------|---------|
| <b>C1_09240C_A</b> | N/A                     | Protein of unknown function; induced during chlamyospore formation in both <i>C. albicans</i> and <i>C. dubliniensis</i>                                                                                                                                     | -2.09394 | 0.03785 |
| <b>C4_06390W_A</b> | <i>SOU1</i>             | Enzyme involved in utilization of L-sorbose; has sorbitol dehydrogenase, fructose reductase, and sorbose reductase activities; NAD-binding site motif; transcriptional regulation affected by chromosome 5 copy number; Hap43p-induced gene                  | -2.06913 | 0.0017  |
| <b>C1_10430W_B</b> | <i>PHO8</i>             | Putative repressible vacuolar alkaline phosphatase; Rim101-induced transcript; regulated by Tsa1, Tsa1B in minimal media at 37 deg; possibly adherence-induced                                                                                               | -1.96872 | 0.02755 |
| <b>C4_03890W_B</b> | <i>PTP2</i>             | Predicted protein tyrosine phosphatase; involved in regulation of MAP kinase Hog1 activity; induced by Mnl1 under weak acid stress; rat catheter and Spider biofilm induced                                                                                  | -1.95454 | 0.0486  |
| <b>CM_00030W</b>   | <i>COX2</i>             | Subunit II of cytochrome c oxidase, which is the terminal member of the mitochondrial inner membrane electron transport chain; one of three mitochondrially-encoded subunits                                                                                 | -1.90643 | 0.03815 |
| <b>CR_04420C_B</b> | <i>RBR2</i>             | Cell wall protein; expression repressed by Rim101; transcript regulated upon white-opaque switching; repressed by alpha pheromone in SpiderM medium; macrophage-induced gene                                                                                 | -1.84517 | 0.02255 |
| <b>C4_06620C_B</b> | <i>LDG11</i><br>(alias) | Protein of unknown function; rat catheter and Spider biofilm induced                                                                                                                                                                                         | -1.83398 | 0.02635 |
| <b>CR_04960C_A</b> | <i>CRG1</i>             | Methyltransferase involved in sphingolipid homeostasis, methylates a drug cantharidin; decreased expression in hyphae compared to yeast; expression regulated during planktonic growth; flow model biofilm induced; Hap43-repressed gene                     | -1.72716 | 0.01065 |
| <b>C3_04080W_B</b> | N/A                     | Ortholog of subunit 6 of the ubiquinol cytochrome-c reductase complex, a component of the mitochondrial inner membrane electron transport chain; Hap43-repressed gene                                                                                        | -1.71289 | 0.0135  |
| <b>C5_00540C_A</b> | <i>AGA1</i>             | Protein with some similarity to agglutinin subunit; expression regulated upon white-opaque switch; Spider biofilm induced                                                                                                                                    | -1.7007  | 0.0218  |
| <b>C6_03600C_A</b> | <i>ALK1</i><br>(alias)  | Putative cytochrome P450; Spider biofilm induced                                                                                                                                                                                                             | -1.65062 | 0.0158  |
| <b>C4_01100C_B</b> | <i>AGP2</i>             | Reg by hap, sef, sfu; Amino acid permease; hyphal repressed; white-opaque switch regulated; induced in core caspofungin response, during cell wall regeneration, by flucytosine; regulated by Sef1, Sfu1, and Hap43; rat catheter and Spider biofilm induced | -1.53575 | 0.00275 |
| <b>C4_05580C_A</b> | N/A                     | Secreted protein; exogenously expressed protein is a substrate for Kex2 processing in vitro; fluconazole-regulated; Spider biofilm induced                                                                                                                   | -1.52322 | 0.0391  |
| <b>CR_04820W_B</b> | N/A                     | Protein of unknown function; Hap43-induced; rat catheter and Spider biofilm induced                                                                                                                                                                          | -1.51326 | 0.0055  |
| <b>C3_00930W_A</b> | <i>ATO2</i>             | Putative fungal-specific transmembrane protein; fluconazole repressed, Hap43-repressed; flow model biofilm induced; Spider biofilm induced                                                                                                                   | -1.50839 | 0.012   |
| <b>C1_05890W_B</b> | N/A                     | Protein of unknown function; substrate for Kex2 processing in vitro; repressed by alpha pheromone in SpiderM medium; Spider biofilm induced; Bcr1-repressed in a/a RPMI biofilms                                                                             | -1.50432 | 0.01795 |
| <b>C6_00740W_A</b> | <i>FAT1</i>             | Predicted enzyme of sphingolipid biosynthesis; upregulated in biofilm                                                                                                                                                                                        | -1.47092 | 0.02455 |
| <b>C2_06070W_B</b> | <i>FAA2-1</i>           | Predicted long chain fatty acid CoA ligase; upregulated upon phagocytosis; induced by nitric oxide independent of Yhb1                                                                                                                                       | -1.46218 | 0.0273  |
| <b>CR_03850W_A</b> | <i>HGT3</i>             | Putative glucose transporter of the major facilitator superfamily; the <i>C. albicans</i> glucose transporter family comprises 20 members; 12 probable membrane-spanning segments, extended C terminus; expressed in rich medium with 2% glucose             | -1.41255 | 0.01505 |
| <b>C3_02790W_B</b> | N/A                     | Ortholog of <i>C. parapsilosis</i> CDC317 : CPAR2_102150, <i>C. dubliniensis</i> CD36 : Cd36_82780, <i>Pichia stipitis</i> Pignal : psti_CGOB_00155 and <i>Candida orthopsilosis</i> Co 90-125 : CORT_0B03450 (5)                                            | -1.40587 | 0.0092  |
| <b>C5_02000C_B</b> | <i>ACH1</i>             | Acetyl-coA hydrolase; acetate utilization; nonessential; soluble protein in hyphae; antigenic in human; induced on polystyrene adherence;                                                                                                                    | -1.39103 | 0.01505 |

|                    |                                            |                                                                                                                                                                                                                                                 |          |         |
|--------------------|--------------------------------------------|-------------------------------------------------------------------------------------------------------------------------------------------------------------------------------------------------------------------------------------------------|----------|---------|
|                    |                                            | farnesol-, ketoconazole-induced; no human or murine homolog; stationary phase-enriched protein                                                                                                                                                  |          |         |
| <b>C2_00680C_A</b> | <i>SOD5</i>                                | Cu-containing superoxide dismutase; protects against oxidative stress; induced by neutrophils, hyphal growth, caspofungin, osmotic/oxidative stress; oralpharyngeal candidiasis induced; rat catheter and Spider biofilm induced                | -1.38752 | 0.02145 |
| <b>C4_01940W_B</b> | <i>PHO89</i>                               | Putative phosphate permease; transcript regulated upon white-opaque switch; alkaline induced by Rim101; possibly adherence-induced; F-12/CO2 model, rat catheter and Spider biofilm induced                                                     | -1.38298 | 0.0348  |
| <b>C3_01060W_A</b> | N/A                                        | Ortholog of <i>C. dubliniensis</i> CD36 : Cd36_29340, <i>Spathaspora passalidarum</i> NRRL Y-27907 : spas_CGOB_00040 and <i>Candida albicans</i> WO-1 : CAWG_00248                                                                              | -1.35489 | 0.0409  |
| <b>C2_07630C_A</b> | N/A                                        | Possible stress protein; increased transcription associated with CDR1 and CDR2 overexpression or fluphenazine treatment; regulated by Sfu1, Nrg1, Tup1; stationary phase enriched protein; Spider biofilm induced                               | -1.33091 | 0.0089  |
| <b>C1_01740W_A</b> | <i>CTN1</i>                                | Carnitine acetyl transferase; required for growth on nonfermentable carbon sources, not for hyphal growth or virulence in mice; induced in macrophage; macrophage/pseudohyphal-repressed after 16 hr; rat catheter, Spider biofilm induced      | -1.32641 | 0.038   |
| <b>C1_09150W_B</b> | <i>AOX2</i>                                | Alternative oxidase; cyanide-resistant respiration; induced by antimycin A, oxidants; growth; Hap43, chlamydospore formation repressed; rat catheter, Spider biofilm induced; regulated in Spider biofilms by Bcr1, Tec1, Ndt80, Brg1           | -1.30376 | 0.043   |
| <b>C3_02570W_B</b> | N/A                                        | Predicted metalloendopeptidase; Spider biofilm induced                                                                                                                                                                                          | -1.25884 | 0.0359  |
| <b>C1_10740C_B</b> | <i>ASR1</i>                                | Heat shock protein; transcript regulated by cAMP, osmotic stress, ciclopirox olamine, ketoconazole; repressed by Cyr1, Ras1; colony morphology-related regulated by Ssn6; stationary phase enriched; Hap43-induced; Spider biofilm induced      | -1.25044 | 0.01335 |
| <b>C1_08330C_B</b> | <i>ADH2</i>                                | Alcohol dehydrogenase; soluble in hyphae; expression regulated by white-opaque switching; regulated by Ssn6; induced by Mnl1 in weak acid stress; protein enriched in stationary phase yeast cultures; Spider biofilm induced                   | -1.2281  | 0.04495 |
| <b>C6_00160W_A</b> | <i>PGA48</i>                               | Putative GPI-anchored adhesin-like protein; similar to <i>S. cerevisiae</i> Spi1p, which is induced at stationary phase; transcript induced in high iron; flow model biofilm induced; Spider biofilm repressed                                  | -1.21915 | 0.02295 |
| <b>C5_04880C_B</b> | <i>PUT2</i>                                | Putative delta-1-pyrroline-5-carboxylate dehydrogenase; alkaline upregulated; protein present in exponential and stationary growth phase yeast cultures; flow model biofilm induced; Spider biofilm induced                                     | -1.21881 | 0.0476  |
| <b>C4_02660W_B</b> | <i>SCD99</i><br>(alias)                    | Protein with a glucose/ribitol dehydrogenase family domain; mutants are viable                                                                                                                                                                  | -1.21814 | 0.04515 |
| <b>C1_04300C_B</b> | <i>SSA2</i>                                | HSP70 family chaperone; cell wall fractions; antigenic; beta-defensin peptides import; ATPase domain binds histatin 5; at hyphal surface, not yeast; farnesol-repressed in biofilm; flow model, Spider biofilm repressed; caspofungin repressed | -1.2119  | 0.0199  |
| <b>C2_06990W_A</b> | <i>AQR1</i> or<br><i>IFT1</i><br>(aliases) | Protein of unknown function; expression regulated by white-opaque switch; repressed by alpha pheromone in SpiderM medium; Spider biofilm induced                                                                                                | -1.20295 | 0.03995 |
| <b>C6_03470W_A</b> | <i>CSR1</i><br>(alias)                     | Putative phosphatidylinositol transfer protein; possibly an essential gene, disruptants not obtained by UAU1 method                                                                                                                             | -1.18416 | 0.03595 |
| <b>CR_06550C_A</b> | N/A                                        | Protein of unknown function; induced by nitric oxide; predicted ORF from Assembly 19; removed from Assembly 20; restored based on transcription data                                                                                            | -1.18299 | 0.02885 |
| <b>C1_11850W_A</b> | N/A                                        | Protein of unknown function; Hap43-repressed gene; mRNA binds to She3; repressed in hyphae; Efg1 and Efh1 regulated; 5'-UTR intron; induced by Mnl1 under weak acid stress; rat catheter biofilm induced                                        | -1.1733  | 0.04345 |

|                    |              |                                                                                                                |          |         |
|--------------------|--------------|----------------------------------------------------------------------------------------------------------------|----------|---------|
| <b>C7_03340C_B</b> | <i>PRR2</i>  | Putative serine/threonine protein kinase; mutation confers resistance to 5-fluorocytosine (5-FC)               | -1.14876 | 0.0326  |
| <b>CR_02510W_B</b> | N/A          | C2H2 transcription factor; induced by Mnl1 under weak acid stress                                              | -1.09957 | 0.03065 |
| <b>C3_04020C_B</b> | <i>ZCF16</i> | Predicted Zn(II)2Cys6 transcription factor; mutants are viable; rat catheter biofilm induced                   | -1.05928 | 0.0478  |
| <b>C6_02500C_B</b> | <i>GCV1</i>  | Putative T subunit of glycine decarboxylase; transcript negatively regulated by Sfu1; Spider biofilm repressed | -1.05165 | 0.03175 |

#
